# Supplementary material
Source: publisher figshare collection journal article supplement (https://tandf.figshare.com/ndownloader/files/13755263)
Supplement: Supplementary file 1 [file 13755263]

**Supplementary information**

**Deformation induced** **intermediate metastable lattice structures facilitate ordered B2 nucleation in a *fcc*-based high entropy alloy**

Deep Choudhuri1,2* Shivakant Shukla2, Bharat Gwalani1, Rajarshi Banerjee1,2, and R.S. Mishra1,2

1 Advanced Materials and Manufacturing Processes Institute, University of North Texas

Denton, TX-76207, USA

2 Department of Materials Science and Engineering, University of North Texas

Denton, TX-76207, USA

*Corresponding author: [deep.choudhuri@unt.edu](mailto:deep.choudhuri@unt.edu)


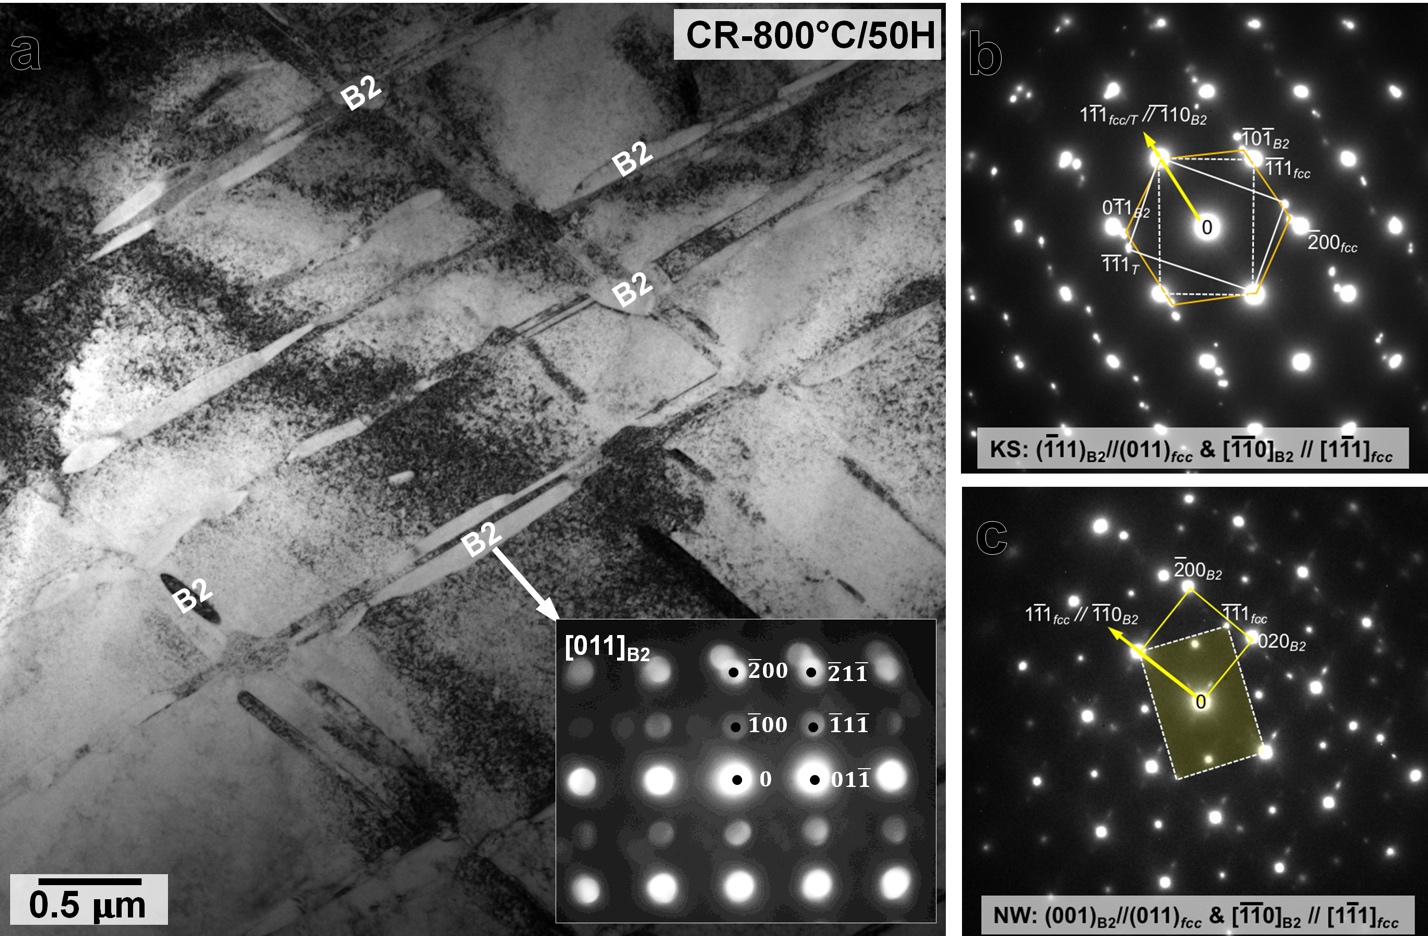


**Supplementary Figure S1.** Microstructure after annealing at 800˚C for 50H.(a) BFTEM showing arrangement of B2 precipitates along the twin boundaries. Inset shows the [011]B2 micro-diffraction pattern from a B2 plate. SADP patterns recorded from different regions show that the B2 plates share both (a) Kurdjumov-Sachs and (c) Nishiyama-Wasserman orientation relationships with the parent fcc phase.


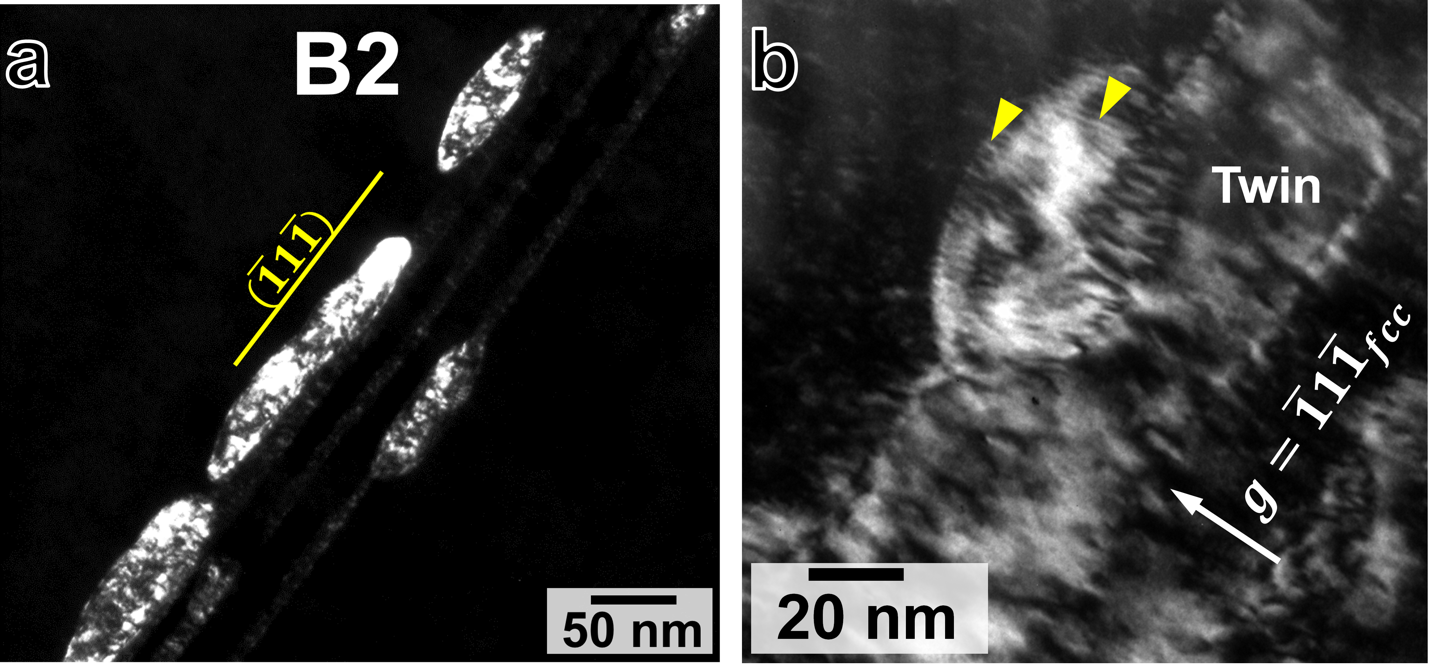


**Supplementary Figure S2.** Microstructure after annealing at 800˚C for 0.5H (30 mins). (a) a DFTEM showing B2 precipitates decorated along the twin boundaries, and (b) a **g-3g** weak-beam DFTEM using **g**=shows the fringes at the B2-fcc interface.


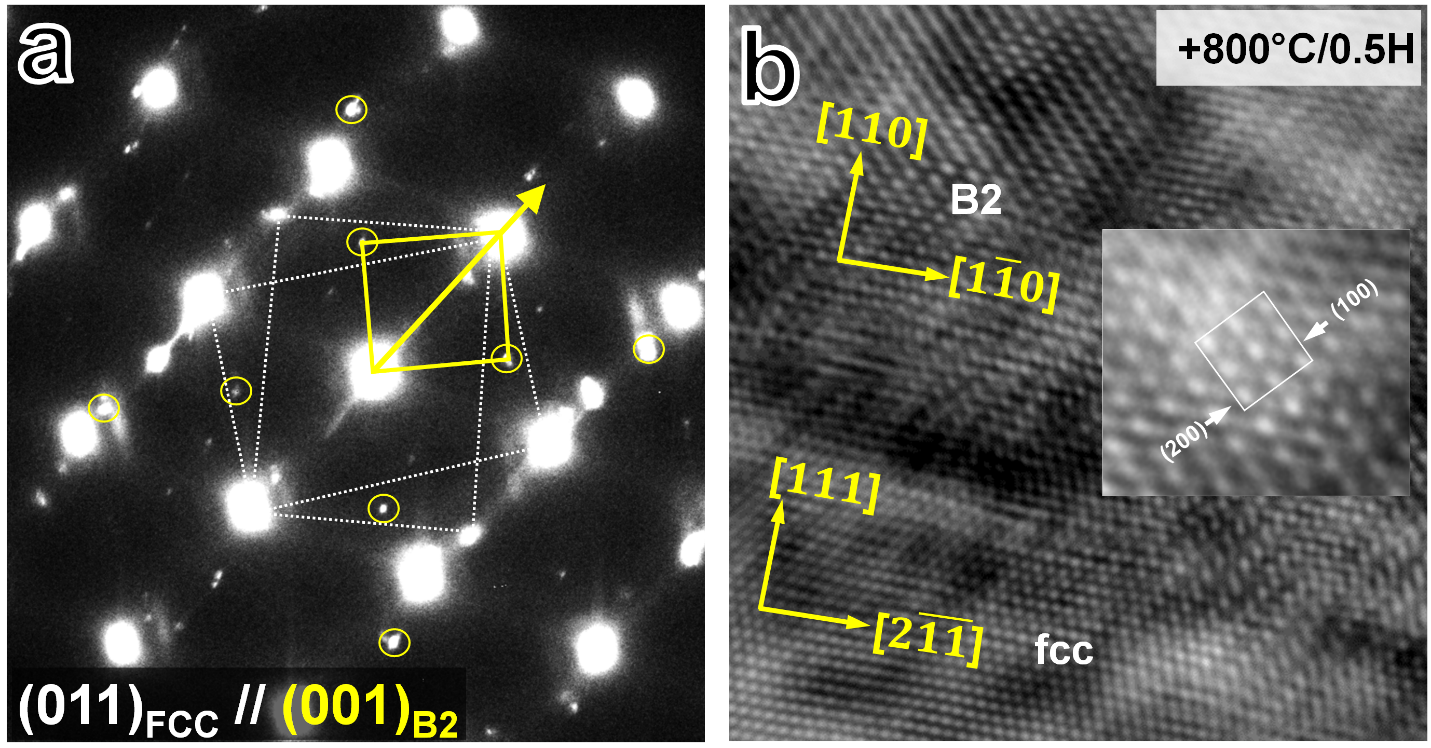


**Supplementary Figure S3.** Microstructure after annealing at 800˚C for 0.5H (30 mins). (a) SADP depicting Nishiyama-Wasserman OR between B2 and fcc, and a corresponding HRTEM showing B2 precipitate next to the fcc matrix. The inset in (b) depicts (001) ordering within B2.


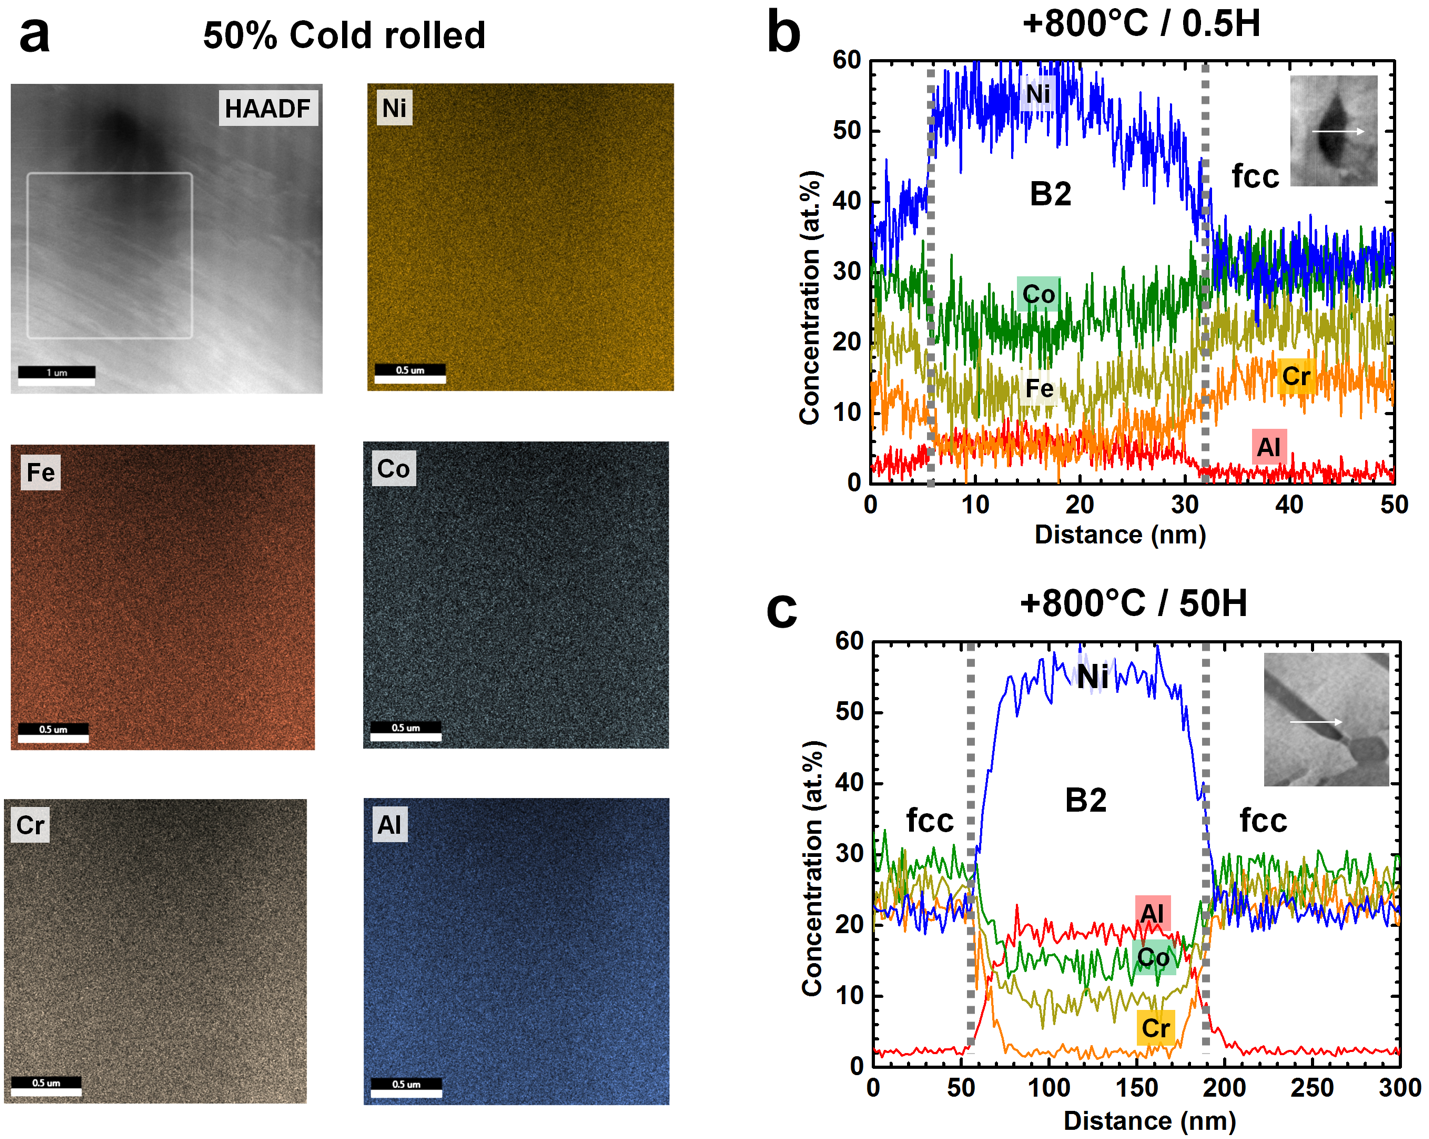


**Supplementary Figure S4.** STEM-EDS results of (a) elemental map of the cold-rolled microstructure, and line profiles across B2 precipitates after (b) 0.5H (30 mins) and (c) 50H of annealing at 800˚C.

**Supplementary Table 1.** B2 composition in at.% at different stages of annealing.

|  | **Al** | | **Co** | | **Cr** | | **Fe** | | **Ni** | |
| --- | --- | --- | --- | --- | --- | --- | --- | --- | --- | --- |
| **Time (H)** | **Avg** | **Stdev** | **Avg** | **Stdev** | **Avg** | **Stdev** | **Avg** | **Stdev** | **Avg** | **Stdev** |
| 0.5 | 3.90 | 1.27 | 22.55 | 3.00 | 22.55 | 3.00 | 13.17 | 1.83 | 55.20 | 3.47 |
| 50 | 18.94 | 0.98 | 14.30 | 1.76 | 2.03 | 0.58 | 9.20 | 1.37 | 55.53 | 1.87 |
